# Supplementary material for: A Statistical Analysis of Risk Factors and Biological Behavior in Canine Mammary Tumors: A Multicenter Study
Source: MDPI journal article supplement (doi:10.3390/ani10091687), 2020-09-18
Supplement: s1 [file s1]

# Supplementary Material

## Logistic Regression

```
## Model 1

##
## Call:
## glm(formula = twolevels ~ new_macro_size, family = binomial,
##      data = tr)
##
## Deviance Residuals:
##      Min       1Q   Median       3Q      Max
## -3.713  -1.126   0.723   1.127   1.314
##
## Coefficients:
##              Estimate Std. Error z value Pr(>|z|)
## (Intercept)  -0.36350    0.07236  -5.024 5.07e-07 ***
## new_macro_size  0.24184    0.02815   8.590 < 2e-16 ***
## ---
## Signif. codes:  0 '***' 0.001 '**' 0.01 '*' 0.05 '.' 0.1 ' ' 1
##
## (Dispersion parameter for binomial family taken to be 1)
##
##      Null deviance: 2577.5  on 1865  degrees of freedom
## Residual deviance: 2481.0  on 1864  degrees of freedom
## AIC: 2485
##
## Number of Fisher Scoring iterations: 4

## Coefficients

##      (Intercept) new_macro_size
##      -0.364      0.242

## Exp coefficients

##      (Intercept) new_macro_size
##      0.695      1.274

## Exp coefficients confidence intervals

## Waiting for profiling to be done...
```

```

##           2.5 % 97.5 %
## (Intercept)    0.603  0.800
## new_macro_size 1.207  1.348

## Model 2

##
## Call:
## glm(formula = twolevels ~ new_macro_size + age, family = binomial,
##      data = tr)
##
## Deviance Residuals:
##      Min       1Q   Median       3Q      Max
## -3.6877  -1.1271   0.6547   1.0906   1.6819
##
## Coefficients:
##              Estimate Std. Error z value Pr(>|z|)
## (Intercept)  -1.33539    0.18153  -7.356 1.89e-13 ***
## new_macro_size  0.22342    0.02815   7.938 2.05e-15 ***
## age           0.11008    0.01871   5.882 4.06e-09 ***
## ---
## Signif. codes:  0 '***' 0.001 '**' 0.01 '*' 0.05 '.' 0.1 ' ' 1
##
## (Dispersion parameter for binomial family taken to be 1)
##
##      Null deviance: 2577.5  on 1865  degrees of freedom
## Residual deviance: 2445.6  on 1863  degrees of freedom
## AIC: 2451.6
##
## Number of Fisher Scoring iterations: 4

## Coefficients

##      (Intercept) new_macro_size      age
##      -1.335      0.223      0.110

## Exp coefficients

##      (Intercept) new_macro_size      age
##      0.263      1.250      1.116

## Exp coefficients confidence intervals

## Waiting for profiling to be done...

##           2.5 % 97.5 %
## (Intercept)    0.184  0.375
## new_macro_size 1.185  1.323
## age           1.076  1.158

## Model 3

```

```

##
## Call:
## glm(formula = twolevels ~ new_macro_size + age + sex, family = binomial,
##      data = tr)
##
## Deviance Residuals:
##      Min       1Q   Median       3Q      Max
## -3.6835  -1.1247   0.6587   1.0943   1.6832
##
## Coefficients:
##              Estimate Std. Error z value Pr(>|z|)
## (Intercept)  -1.33754    0.18162  -7.364 1.78e-13 ***
## new_macro_size  0.22327    0.02815   7.933 2.14e-15 ***
## age           0.10940    0.01879   5.823 5.80e-09 ***
## sexfs         0.05246    0.13008   0.403  0.687
## ---
## Signif. codes:  0 '***' 0.001 '**' 0.01 '*' 0.05 '.' 0.1 ' ' 1
##
## (Dispersion parameter for binomial family taken to be 1)
##
##      Null deviance: 2577.5  on 1865  degrees of freedom
## Residual deviance: 2445.4  on 1862  degrees of freedom
## AIC: 2453.4
##
## Number of Fisher Scoring iterations: 4

## Coefficients

##      (Intercept) new_macro_size      age      sexfs
##      -1.338      0.223      0.109      0.052

## Exp coefficients

##      (Intercept) new_macro_size      age      sexfs
##      0.262      1.250      1.116      1.054

## Exp coefficients confidence intervals

## Waiting for profiling to be done...

##              2.5 % 97.5 %
## (Intercept)  0.183  0.374
## new_macro_size 1.185  1.323
## age           1.075  1.158
## sexfs         0.817  1.361

## Model 4

##
## Call:
## glm(formula = twolevels ~ new_macro_size + age + sex + breed_two,
##      family = binomial, data = tr)

```

```

##
## Deviance Residuals:
##      Min       1Q   Median       3Q      Max
## -3.7033  -1.1280   0.6698   1.1091   1.6923
##
## Coefficients:
##              Estimate Std. Error z value Pr(>|z|)
## (Intercept)    -1.26254    0.19823  -6.369 1.90e-10 ***
## new_macro_size     0.22408    0.02817   7.956 1.78e-15 ***
## age              0.10742    0.01891   5.680 1.34e-08 ***
## sexfs            0.04566    0.13030   0.350  0.726
## breed_twopurebreed -0.09343    0.09952  -0.939  0.348
## ---
## Signif. codes:  0 '***' 0.001 '**' 0.01 '*' 0.05 '.' 0.1 ' ' 1
##
## (Dispersion parameter for binomial family taken to be 1)
##
##      Null deviance: 2577.5  on 1865  degrees of freedom
## Residual deviance: 2444.5  on 1861  degrees of freedom
## AIC: 2454.5
##
## Number of Fisher Scoring iterations: 4

## Coefficients

##      (Intercept)      new_macro_size      age      sexfs
##      -1.263         0.224         0.107         0.046
## breed_twopurebreed
##      -0.093

## Exp coefficients

##      (Intercept)      new_macro_size      age      sexfs
##      0.283         1.251         1.113         1.047
## breed_twopurebreed
##      0.911

## Exp coefficients confidence intervals

## Waiting for profiling to be done...

##      2.5 % 97.5 %
## (Intercept)    0.191 0.416
## new_macro_size 1.186 1.324
## age            1.073 1.156
## sexfs          0.811 1.352
## breed_twopurebreed 0.749 1.107

## Likelihood-Ratio test

## Analysis of Deviance Table
##

```

```

## Model 1: twolevels ~ new_macro_size
## Model 2: twolevels ~ new_macro_size + age
## Model 3: twolevels ~ new_macro_size + age + sex
## Model 4: twolevels ~ new_macro_size + age + sex + breed_two
##   Resid. Df Resid. Dev Df Deviance  Pr(>Chi)
## 1      1864      2481.0
## 2      1863      2445.6  1   35.482 2.574e-09 ***
## 3      1862      2445.4  1    0.163  0.6866
## 4      1861      2444.5  1    0.882  0.3478
## ---
## Signif. codes:  0 '***' 0.001 '**' 0.01 '*' 0.05 '.' 0.1 ' ' 1

## Analysis of Deviance Table
##
## Model: binomial, link: logit
##
## Response: twolevels
##
## Terms added sequentially (first to last)
##
##
##              Df Deviance Resid. Df Resid. Dev  Pr(>Chi)
## NULL                      1865      2577.5
## new_macro_size  1   96.444      1864      2481.0 < 2.2e-16 ***
## age             1   35.482      1863      2445.6 2.574e-09 ***
## sex             1    0.163      1862      2445.4  0.6866
## breed_two       1    0.882      1861      2444.5  0.3478
## ---
## Signif. codes:  0 '***' 0.001 '**' 0.01 '*' 0.05 '.' 0.1 ' ' 1

```

## Categorized

```

## Model IC

##
## Call:
## glm(formula = twolevels ~ TNM + age_groups, family = binomial,
##      data = tr)
##
## Deviance Residuals:
##      Min       1Q   Median       3Q      Max
## -1.9607  -1.1900   0.6894   1.1649   1.3657
##
## Coefficients:
##              Estimate Std. Error z value Pr(>|z|)
## (Intercept)   -0.426956  0.235037  -1.817  0.06929 .
## TNMT2           0.835155  0.135762   6.152 7.67e-10 ***
## TNMT3           1.286219  0.181528   7.086 1.39e-12 ***
## age_groups5-8  -0.005382  0.247179  -0.022  0.98263
## age_groups9-12  0.456486  0.243882   1.872  0.06124 .
## age_groups13-22 0.904838  0.282107   3.207  0.00134 **
## ---

```

```

## Signif. codes:  0 '***' 0.001 '**' 0.01 '*' 0.05 '.' 0.1 ' ' 1
##
## (Dispersion parameter for binomial family taken to be 1)
##
##    Null deviance: 2577.5  on 1865  degrees of freedom
## Residual deviance: 2439.1  on 1860  degrees of freedom
## AIC: 2451.1
##
## Number of Fisher Scoring iterations: 4

## Coefficients

##      (Intercept)          TNMT2          TNMT3  age_groups5-8  age_groups9-12
##      -0.427         0.835         1.286         -0.005          0.456
## age_groups13-22
##      0.905

## Exp coefficients

##      (Intercept)          TNMT2          TNMT3  age_groups5-8  age_groups9-12
##      0.652         2.305         3.619         0.995          1.579
## age_groups13-22
##      2.472

## Exp coefficients confidence intervals

## Waiting for profiling to be done...

##      2.5 % 97.5 %
## (Intercept)  0.409  1.031
## TNMT2       1.771  3.017
## TNMT3       2.557  5.217
## age_groups5-8  0.614  1.623
## age_groups9-12 0.981  2.560
## age_groups13-22 1.426  4.320

## Model IIC

##
## Call:
## glm(formula = twolevels ~ srn + age_groups, family = binomial,
##      data = tr)
##
## Deviance Residuals:
##      Min       1Q   Median       3Q      Max
## -1.9447  -1.0603   0.6906   1.1213   1.4960
##
## Coefficients:
##      Estimate Std. Error z value Pr(>|z|)
## (Intercept)  -0.7126     0.2494  -2.858  0.00426 **
## srn1-2        0.2901     0.1280   2.266  0.02346 *
## srn2-3        0.7612     0.1502   5.069 4.01e-07 ***

```

```

## srn3-5          1.1441      0.1577    7.257 3.97e-13 ***
## srn>5           1.5938      0.1983    8.036 9.29e-16 ***
## age_groups5-8   -0.0110     0.2492   -0.044 0.96479
## age_groups9-12   0.4307     0.2459    1.751 0.07989 .
## age_groups13-22  0.8462     0.2843    2.976 0.00292 **
## ---
## Signif. codes:  0 '***' 0.001 '**' 0.01 '*' 0.05 '.' 0.1 ' ' 1
##
## (Dispersion parameter for binomial family taken to be 1)
##
##    Null deviance: 2577.5  on 1865  degrees of freedom
## Residual deviance: 2413.0  on 1858  degrees of freedom
## AIC: 2429
##
## Number of Fisher Scoring iterations: 4

## Coefficients

##      (Intercept)          srn1-2          srn2-3          srn3-5          srn>5
##      -0.713         0.290         0.761         1.144         1.594
## age_groups5-8 age_groups9-12 age_groups13-22
##      -0.011         0.431         0.846

## Exp coefficients

##      (Intercept)          srn1-2          srn2-3          srn3-5          srn>5
##      0.490         1.337         2.141         3.140         4.922
## age_groups5-8 age_groups9-12 age_groups13-22
##      0.989         1.538         2.331

## Exp coefficients confidence intervals

## Waiting for profiling to be done...

##      2.5 % 97.5 %
## (Intercept)  0.299 0.797
## srn1-2       1.040 1.719
## srn2-3       1.597 2.878
## srn3-5       2.310 4.288
## srn>5        3.361 7.324
## age_groups5-8 0.608 1.620
## age_groups9-12 0.952 2.504
## age_groups13-22 1.339 4.091

## R version 3.6.3 (2020-02-29)
## Platform: x86_64-w64-mingw32/x64 (64-bit)
## Running under: Windows 10 x64 (build 19041)
##
## Matrix products: default
##
## locale:
## [1] LC_COLLATE=Italian_Italy.1252 LC_CTYPE=Italian_Italy.1252

```

```
## [3] LC_MONETARY=Italian_Italy.1252 LC_NUMERIC=C
## [5] LC_TIME=Italian_Italy.1252
##
## attached base packages:
## [1] stats      graphics  grDevices  utils      datasets  methods   base
##
## other attached packages:
## [1] pacman_0.5.1
##
## loaded via a namespace (and not attached):
## [1] MASS_7.3-51.5  compiler_3.6.3 magrittr_1.5    tools_3.6.3
## [5] htmltools_0.4.0 yaml_2.2.1      Rcpp_1.0.3      stringi_1.4.6
## [9] rmarkdown_2.1  knitr_1.28      stringr_1.4.0   xfun_0.12
## [13] digest_0.6.25  rlang_0.4.5     evaluate_0.14
```
